# Supplementary material for: Expanding the horizons of the thermodynamic landscape and optoelectronic properties of soft 2D hybrid perovskites MHy2PbX4
Source: Royal Society of Chemistry journal article supplement (doi:10.1039/d4ta02484b), 2024-01-01
Supplement: d4ta02484b1.pdf [file d4ta02484b1.pdf]

## Supporting Information:

# Expanding the Horizons of Thermodynamic Landscape and Optoelectronic Properties of Soft 2D Hybrid Perovskites $MHy_2PbX_4$

Szymon Sobczak<sup>\*,a</sup>, Andrzej Nowok<sup>b,c</sup>, Jan K. Zaręba<sup>d</sup>, Aleksandra Pórolniczak,<sup>a</sup> Kinga Roszak,<sup>a</sup> Anna Z. Szeremeta<sup>c</sup>, Błażej Dziuk<sup>d</sup>, Filip Dybala<sup>f</sup>, Sebastian Pawlus<sup>e</sup>, Robert Kudrawiec<sup>f</sup>, Adam Sieradzki<sup>c</sup>, Mirosław Mączka<sup>g,\*</sup> Andrzej Katrusiak<sup>\*,a</sup>

<sup>a</sup> Faculty of Chemistry, Adam Mickiewicz University, Uniwersytetu Poznańskiego 8, 61-614 Poznań, Poland

<sup>b</sup> Laboratoire National des Champs Magnétiques Intenses, EMFL, CNRS UPR 3228, Université Toulouse, Université Toulouse 3, INSA-T, Toulouse 31400, France

<sup>c</sup> Department of Experimental Physics, Wrocław University of Science and Technology, Wybrzeże Wyspiańskiego 27, 50-370, Wrocław, Poland

<sup>d</sup> Institute of Advanced Materials, Wrocław University of Science and Technology, Wybrzeże Wyspiańskiego 27, 50-370, Wrocław, Poland

<sup>e</sup> August Chelkowski Institute of Physics, University of Silesia in Katowice, ul. 75 Pułku Piechoty 1, 41-500 Chorzów, Poland

<sup>f</sup> Department of Semiconductor Materials Engineering, Wrocław University of Science and Technology, Wybrzeże Wyspiańskiego 27, 50-370, Wrocław, Poland

<sup>g</sup> Institute of Low Temperature and Structure Research, Polish Academy of Sciences, Okólna 2, 50-422 Wrocław, Poland

### Reassignment of phase II-MHy<sub>2</sub>PbI<sub>4</sub>

The X-ray diffraction experiments performed at elevated temperatures, from 300 to 370 K, revealed unassigned layer of reflections appearing perpendicular to direction [001] below 320 K (Figure S1). The low intensity of the reflections is connected with the strong absorption of the X-ray radiation by the crystalline sample and the character of temperature-induced phase

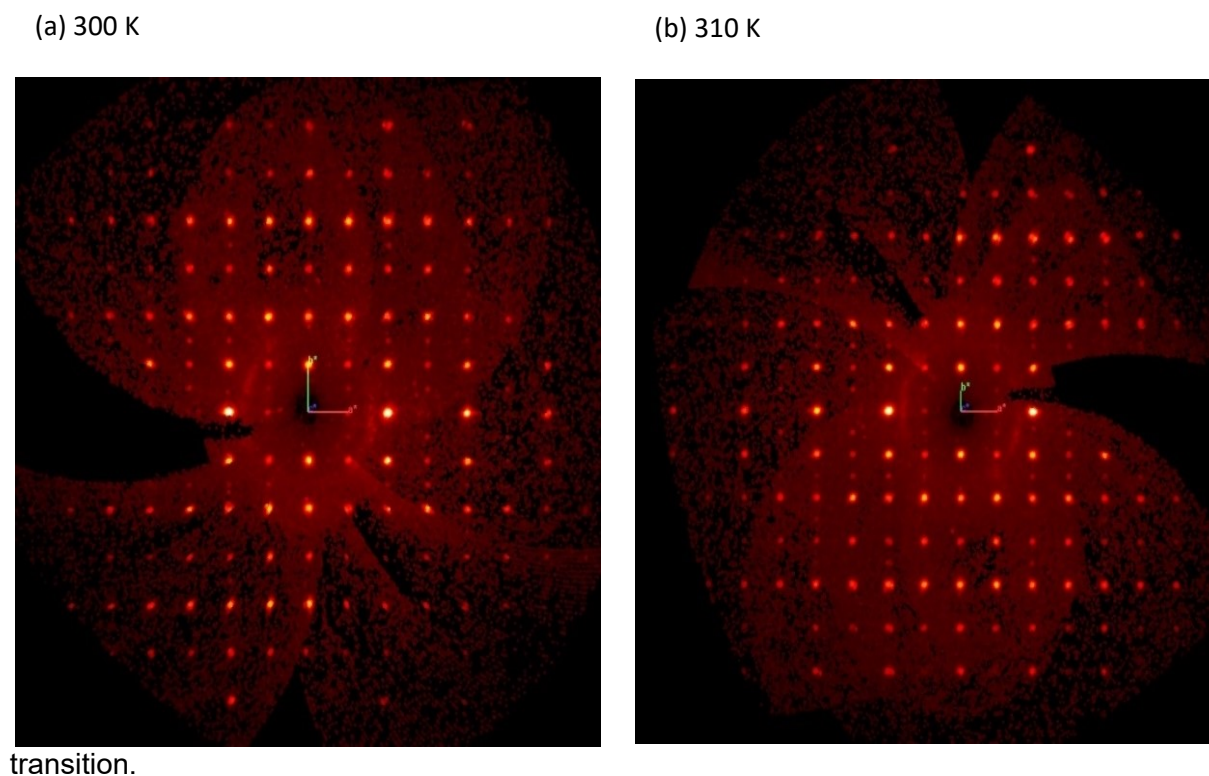

**Figure S1.** The reconstruction of  $hk0$  layers of II-MHy<sub>2</sub>PbI<sub>4</sub> collected at (a) 300 K and (b) 310 K in respect to phases reported in ref 24. A row of unassigned reflections were indicated for each image.

### Ferroelectricity of phase IV-MHy<sub>2</sub>PbI<sub>4</sub>

In order to understand the ferroelectric properties of VI-MHy<sub>2</sub>PbI<sub>4</sub>, we closely examine the ferroelectric phase III of MHy<sub>2</sub>PbBr<sub>4</sub>, which provides a structural and functional prototype. The study described by Maćzka et al. (*Chem. Mater.* 2021, 33, 7, 2331–2342) reveals that a strong

dielectric response and spontaneous polarization in phase III of  $\text{MHy}_2\text{PbBr}_4$  originates in the orientation of the  $\text{MHy}^+$  cations and the distortion of the polyanionic framework.

Although the both phases share isomorphic features and comparable octahedral distortions, the specific reorientation of cations in VI- $\text{MHy}_2\text{PbI}_4$  suggests a unique redistribution of dipole moments, which is expected to be the primary contributor to its ferroelectric properties. Furthermore, the slight shifts in halogen positions in VI- $\text{MHy}_2\text{PbI}_4$ , could modulate the polarization field, reinforcing the effect induced by cation rotation. Consequently, the ferroelectric character of VI- $\text{MHy}_2\text{PbI}_4$  obtained at high-pressure emerges from a multifaceted interaction of these structural characteristics, mirroring the ferroelectric determinants of III-

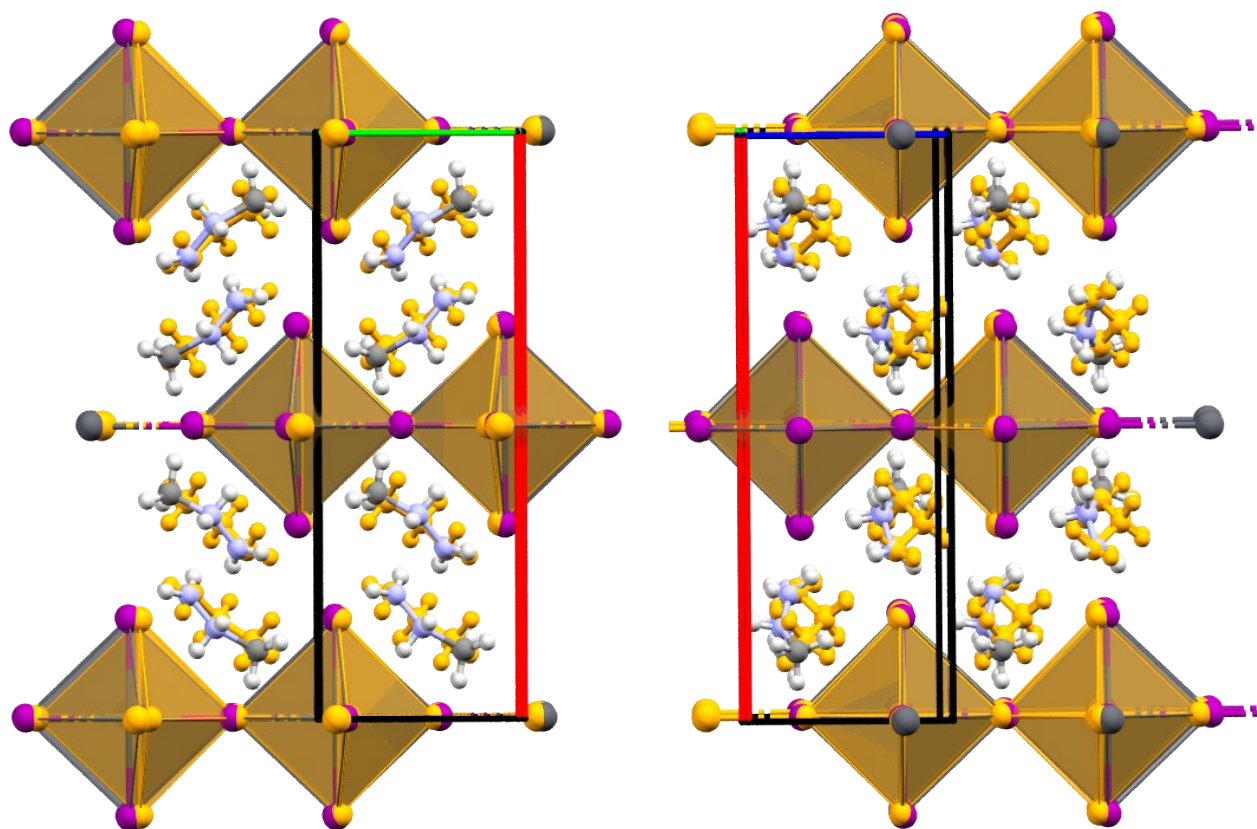

$\text{MHy}_2\text{PbBr}_4$ , yet exhibiting inherent distinctions owing to the halogen variation.

**Figure S4.** The unit-cell of VI- $\text{MHy}_2\text{PbI}_4$  at 1.15 GPa with atom-specific color coding: lead (black), iodine (purple), carbon (grey), nitrogen (blue), and hydrogen (white) superimposed on structure of ambient-pressure III- $\text{MHy}_2\text{PbBr}_4$  (coloured yellow) with respect to the coordination sphere of the  $\text{Pb}^{2+}$  metal center.

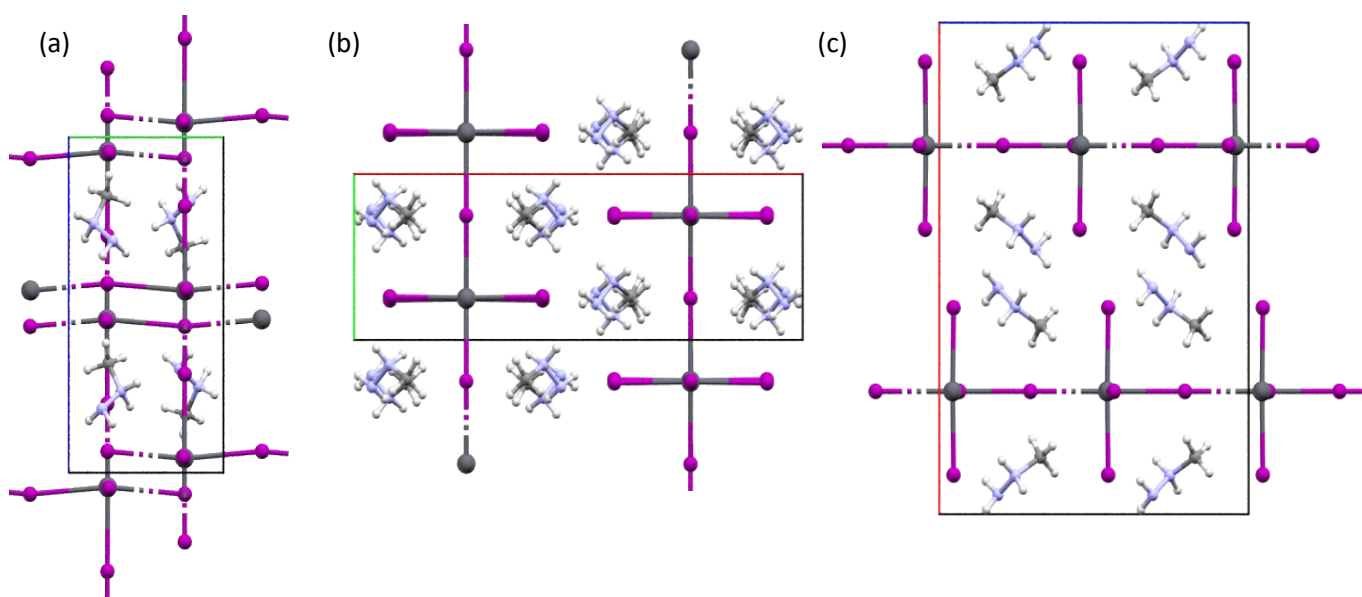

**Figure S2.** The unit-cell projection of II-MHy<sub>2</sub>PbI<sub>4</sub> projected along (a) [100]; (b) [010] and (c) [001] at 300K.

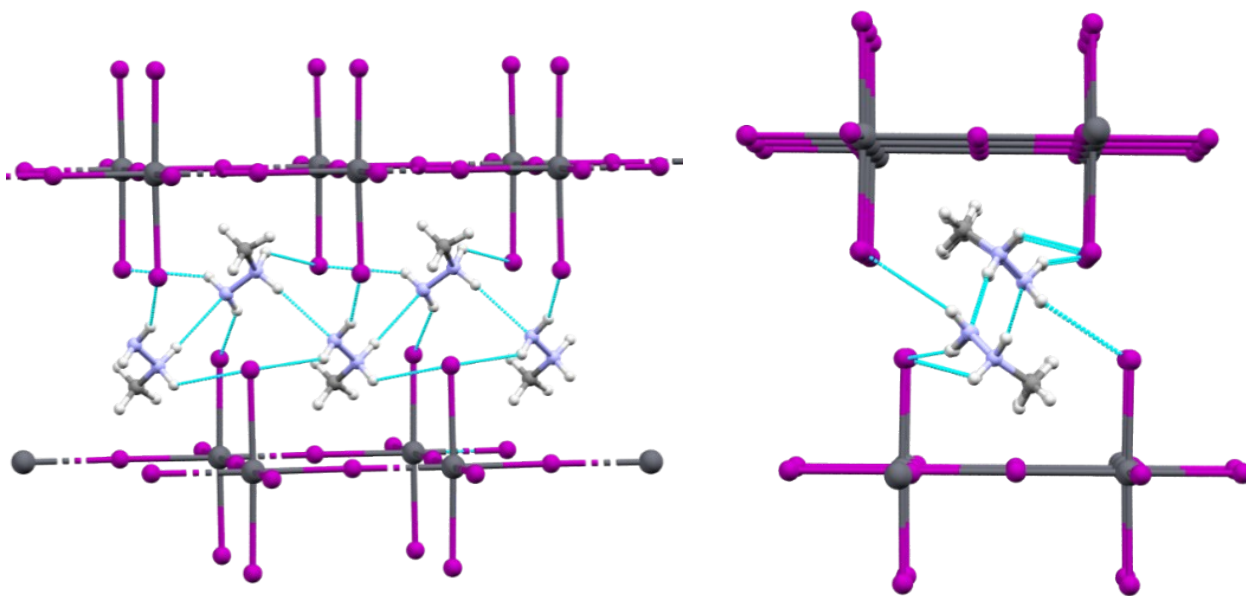

**Figure S3.** The H-bond pattern present in II-MHy<sub>2</sub>PbI<sub>4</sub> at 300 K.

| Bonds (Å)             | 0.22 GPa | 1.00 GPa |
|-----------------------|----------|----------|
| Pb1-I1                | 3.18900  | 3.17200  |
| Pb1-I1 <sup>i</sup>   | 3.18900  | 3.17200  |
| Pb1-I2                | 3.11300  | 3.09100  |
| Pb1-I2 <sup>ii</sup>  | 3.11300  | 3.09100  |
| Pb1-I3                | 3.18000  | 3.16000  |
| Pb1-I3 <sup>iii</sup> | 3.18000  | 3.16000  |
| <i>d</i> (Å)          | 3.16067  | 3.14100  |
| $\Delta d$            | 0.00115  | 0.00127  |

**Table S1.** The Pb–I bond length in phase **V** at different pressures.

*i* = *x*, *y*, 1 + *z*; *ii* = -*x*, *y*, *z*; *iii* = *x*, 1 + *y*, *z*

| Bonds (Å)             | 1.30 GPa | 1.70 GPa | 2.10 GPa | 2.64 GPa | 3.00 GPa |
|-----------------------|----------|----------|----------|----------|----------|
| Pb1-I1                | 3.14300  | 3.14200  | 3.16200  | 3.17700  | 3.12500  |
| Pb1-I1 <sup>i</sup>   | 3.14300  | 3.14200  | 3.16200  | 3.17700  | 3.12500  |
| Pb1-I2                | 3.00900  | 3.09100  | 3.09600  | 3.02600  | 3.01900  |
| Pb1-I2 <sup>ii</sup>  | 3.00900  | 3.09100  | 3.09600  | 3.02600  | 3.01900  |
| Pb1-I3                | 3.15400  | 3.15700  | 3.11800  | 3.10600  | 3.13900  |
| Pb1-I3 <sup>iii</sup> | 3.15400  | 3.15700  | 3.11800  | 3.10600  | 3.13900  |
| <i>d</i> (Å)          | 3.10200  | 3.13000  | 3.12533  | 3.10300  | 3.09433  |
| $\Delta d$            | 0.00434  | 0.00080  | 0.00075  | 0.00380  | 0.00287  |

**Table S2.** The distortions of the individual Pbl<sub>6</sub> octahedra in phase **VI** at different pressures.

| Bonds (Å) | 3.30 GPa | 3.74 GPa | 4.20 GPa |           | 3.30 GPa | 3.74 GPa | 4.20 GPa |
|-----------|----------|----------|----------|-----------|----------|----------|----------|
| Pb1A-I1A  | 3.09000  | 3.04100  | 3.09900  | Pb1b-I1b  | 3.10000  | 3.10800  | 3.11200  |
| Pb1A-I1A' | 3.11900  | 3.13500  | 3.12600  | Pb1b-I1b' | 3.10800  | 3.12100  | 3.12300  |
| Pb1A-I2A  | 2.98600  | 3.18100  | 2.96700  | Pb1b-I2b  | 2.99200  | 3.29900  | 3.09300  |

|                                                         |         |         |         |            |         |         |         |
|---------------------------------------------------------|---------|---------|---------|------------|---------|---------|---------|
| Pb1A-I3A                                                | 3.05400 | 3.03500 | 3.05900 | Pb1b-I3b   | 3.05400 | 3.06300 | 3.05400 |
| Pb1A-I3A''                                              | 3.14600 | 3.13500 | 3.18400 | Pb1b-I3b'' | 3.16700 | 3.18200 | 3.20500 |
| Pb1A-I4A                                                | 2.98300 | 3.02600 | 3.12100 | Pb1b-I4b   | 2.97500 | 2.89500 | 2.97200 |
| <i>d</i>                                                | 3.06300 | 3.09217 | 3.09267 | <i>d</i>   | 3.06600 | 3.11133 | 3.09317 |
| $\Delta d$                                              | 0.00386 | 0.00364 | 0.00454 | $\Delta d$ | 0.00450 | 0.01491 | 0.00499 |
| $i = 1 - x, -\frac{1}{2} + y, 1 - z; ii = -1 + x, y, z$ |         |         |         |            |         |         |         |

**Table S3.** The bond length in phase **VII** at different pressures.

**Table S4.** Bond angle variance of the individual  $PbI_6$  octahedra in phase **V** at different pressures.

| Bond Angles (°)                                 | 0.22 GPa | 1.00 GPa |
|-------------------------------------------------|----------|----------|
| I1-Pb1- I2                                      | 89.98    | 90.03    |
| I1-Pb1- I 2 <sup>i</sup>                        | 89.98    | 90.03    |
| I1-Pb1-I3                                       | 90.24    | 96.80    |
| I1-Pb1-I3 <sup>ii</sup>                         | 89.76    | 83.20    |
| I3-Pb1-I1 <sup>iii</sup>                        | 89.98    | 90.03    |
| I3-Pb1-I2                                       | 89.98    | 90.03    |
| I3-Pb1-I2 <sup>i</sup>                          | 90.24    | 96.80    |
| I2-Pb1-I1 <sup>iii</sup>                        | 89.76    | 83.20    |
| I2-Pb1-I3 <sup>ii</sup>                         | 90.24    | 90.24    |
| I1 <sup>iii</sup> -Pb1-I2 <sup>i</sup>          | 89.76    | 89.76    |
| I2 <sup>i</sup> -Pb1-I3 <sup>ii</sup>           | 90.24    | 90.24    |
| I1 <sup>iii</sup> -Pb1-I3 <sup>ii</sup>         | 89.76    | 89.76    |
| $\sigma(^{\circ})$                              | 0.04204  | 16.83582 |
| $i = -x, y, z; ii = x, 1+y, z; iii = x, y, 1+z$ |          |          |

**Table S5.** Bond angle variance of the individual  $PbI_6$  octahedra in phase **VI** at different pressures

| Bond Angles (°)                         | 1.30 GPa | 1.70 GPa | 2.10 GPa | 2.64 GPa | 3.00 GPa |
|-----------------------------------------|----------|----------|----------|----------|----------|
| I1-Pb1- I2                              | 90.45    | 90.94    | 90.95    | 91.28    | 91.30    |
| I1-Pb1- I 2 <sup>i</sup>                | 89.52    | 89.19    | 89.17    | 88.84    | 88.79    |
| I1-Pb1-I3                               | 96.73    | 101.13   | 101.24   | 101.98   | 102.55   |
| I1-Pb1-I3 <sup>ii</sup>                 | 85.76    | 84.40    | 84.44    | 84.14    | 83.75    |
| I3-Pb1-I1 <sup>iii</sup>                | 90.45    | 90.94    | 90.95    | 91.28    | 91.30    |
| I3-Pb1-I2                               | 89.52    | 89.19    | 89.17    | 88.84    | 88.79    |
| I3-Pb1-I2 <sup>i</sup>                  | 94.30    | 95.60    | 95.55    | 95.95    | 96.29    |
| I2-Pb1-I1 <sup>iii</sup>                | 83.21    | 78.86    | 78.77    | 77.93    | 77.40    |
| I2-Pb1-I3 <sup>ii</sup>                 | 90.17    | 90.38    | 90.37    | 90.33    | 90.20    |
| I1 <sup>iii</sup> -Pb1-I2 <sup>i</sup>  | 89.81    | 89.53    | 89.54    | 89.54    | 89.66    |
| I2 <sup>i</sup> -Pb1-I3 <sup>ii</sup>   | 90.17    | 90.38    | 90.37    | 90.33    | 90.20    |
| I1 <sup>iii</sup> -Pb1-I3 <sup>ii</sup> | 89.81    | 89.53    | 89.54    | 89.54    | 89.66    |

|                                                      |          |          |          |          |          |
|------------------------------------------------------|----------|----------|----------|----------|----------|
| $\sigma(^{\circ})$                                   | 11.71458 | 28.59150 | 28.91331 | 33.23240 | 36.50077 |
| $i= 1/2-x, 1.5-y, z; ii= x, y, -1+z; iii= x, 1+y, z$ |          |          |          |          |          |

**Table S6.** Bond angle variance of the individual  $\text{PbI}_6$  octahedra in phase **VII** at different pressures.

| Bond Angles ( $^{\circ}$ ) | 3.30 GPa | 3.74 GPa | 4.20 GPa |                            | 3.30 GPa | 3.74 GPa | 4.20 GPa |
|----------------------------|----------|----------|----------|----------------------------|----------|----------|----------|
| I1A-Pb1A-I2A               | 88.84    | 87.82    | 95.10    | I1B-Pb1B-I2B               | 92.82    | 94.72    | 87.17    |
| I1A-Pb1A-I3A               | 79.61    | 78.56    | 93.94    | I1B-Pb1B-I3B               | 102.64   | 105.57   | 108.61   |
| I1A-Pb1A-I3A <sup>ii</sup> | 83.53    | 83.89    | 82.89    | I1B-Pb1B-I3B <sup>ii</sup> | 97.21    | 97.28    | 88.20    |
| I1A-Pb1A-I4A               | 92.95    | 91.45    | 88.12    | I1B-Pb1B-I4B               | 90.86    | 88.64    | 91.04    |
| I3A-Pb1A-I1A <sup>i</sup>  | 101.27   | 104.69   | 107.26   | I3B-Pb1B-I1B <sup>i</sup>  | 77.52    | 75.14    | 94.43    |
| I3A-Pb1A-I2A               | 86.14    | 91.58    | 85.15    | I3B-Pb1B-I2B               | 95.96    | 100.58   | 84.20    |
| I3A-Pb1A-I4A               | 98.73    | 93.69    | 85.58    | I3B-Pb1B-I4B               | 87.21    | 84.20    | 87.41    |
| I2A-Pb1A-I1A <sup>i</sup>  | 86.05    | 91.34    | 87.78    | I2B-Pb1B-I1B <sup>i</sup>  | 86.53    | 84.55    | 88.54    |
| I2A-Pb1A-I3A <sup>ii</sup> | 86.36    | 87.25    | 88.08    | I2B-Pb1B-I3B <sup>ii</sup> | 87.99    | 86.99    | 99.32    |
| I1Ai-Pb1A-I4A              | 92.04    | 89.08    | 88.51    | I1Bi-Pb1B-I4B              | 89.78    | 92.04    | 92.61    |
| I4A-Pb1A-I3A <sup>ii</sup> | 89.25    | 87.18    | 99.64    | I4B-Pb1B-I3B <sup>ii</sup> | 87.49    | 86.68    | 81.07    |

|                                                |          |          |          |                                          |          |          |          |
|------------------------------------------------|----------|----------|----------|------------------------------------------|----------|----------|----------|
| I1A <sup>i</sup> -Pb1A-I3A <sup>ii</sup>       | 94.88    | 92.85    | 76.20    | I1B <sup>i</sup> -Pb1B-I3B <sup>ii</sup> | 82.69    | 82.13    | 76.16    |
| $\delta_2$                                     | 39.57974 | 39.38624 | 66.43555 | $\delta_2$                               | 45.03340 | 72.89371 | 71.43020 |
| $i = 1-x, \frac{1}{2}+y, -z; ii = -1+ x, y, z$ |          |          |          |                                          |          |          |          |

**Table S7.** Compressibility related to crystallographic axes calculated for the phase **V** of  $\text{MHy}_2\text{PbI}_4$  calculated in the range between 0.22 MPa and 1.00 GPa with Birch-Murnaghan coefficients.

| Axes           | K(TPa <sup>-1</sup> ) | $\sigma$ K(TPa <sup>-1</sup> ) | Direction |          |          | Empirical parameters |             |         |        |
|----------------|-----------------------|--------------------------------|-----------|----------|----------|----------------------|-------------|---------|--------|
|                |                       |                                | <i>a</i>  | <i>b</i> | <i>c</i> | $\epsilon_0$         | $\lambda$   | $P_c$   | $\nu$  |
| X <sub>1</sub> | 36.9659               | 4.4405                         | -1.00     | -0.00    | 0.00     | -3.4584e-04          | -4.0863e-02 | 0.0010  | 0.6343 |
| X <sub>2</sub> | 10.0949               | 4.0684                         | -0.00     | 1.00     | -0.00    | 8.6470e-01           | -7.5689e-01 | -4.3481 | 0.0902 |
| X <sub>3</sub> | 6.5380                | 4.7743                         | 0.00      | 0.00     | 1.00     | 1.6208e-03           | -1.0584e-02 | 0.0010  | 1.0849 |
| V              | 53.0693               | 2.8529                         |           |          |          |                      |             |         |        |

Birch-Murnaghan Coefficients

|                 | $B_0$ (GPa) | $\sigma B_0$ (GPa) | $V_0$ (Å <sup>3</sup> ) | $\sigma V_0$ (Å <sup>3</sup> ) | $B'$ | $\sigma B'$ | $P_c$ (GPa) |
|-----------------|-------------|--------------------|-------------------------|--------------------------------|------|-------------|-------------|
| 2 <sup>nd</sup> | 16.0973     | 0.7856             | 758.5795                | 3.6996                         | 4    | 0.9872      | 0           |

**Table S8.** Compressibility related to crystallographic axes calculated for the phase **VI** of  $\text{MHy}_2\text{PbI}_4$  calculated in the range between 1.30 GPa and 3.00 GPa with Birch-Murnaghan coefficients.

| Axes | K(TPa <sup>-1</sup> ) | $\sigma$ K(TPa <sup>-1</sup> ) | Direction |          |          | Empirical parameters |             |        |        |
|------|-----------------------|--------------------------------|-----------|----------|----------|----------------------|-------------|--------|--------|
|      |                       |                                | <i>a</i>  | <i>b</i> | <i>c</i> | $\epsilon_0$         | $\lambda$   | $P_c$  | $\nu$  |
| X1   | 21.1055               | 9.3120                         | -0.0000   | -1.0000  | 0.0000   | -7.8157e-04          | -2.1715e-02 | 1.3000 | 0.9782 |
| X2   | 76.5033               | 8.5744                         | -1.0000   | 0.0000   | 0.0000   | 3.0333e-02           | -3.3787e-02 | 1.3000 | 1.7945 |
| X3   | 26.4176               | 4.5864                         | 0.0000    | 0.0000   | 1.0000   | 1.4812e-02           | -9.2386e-03 | 1.3000 | 2.0828 |
| V    | 35.0186               | 1.2362                         |           |          |          |                      |             |        |        |

Birch-Murnaghan Coefficients

|                 | $B_0$ (GPa) | $\sigma B_0$ (GPa) | $V_0$ (Å <sup>3</sup> ) | $\sigma V_0$ (Å <sup>3</sup> ) |
|-----------------|-------------|--------------------|-------------------------|--------------------------------|
| 2 <sup>nd</sup> | 19.4616     | 1.7843             | 739.0541                | 5.4497                         |
| 3 <sup>rd</sup> | 25.3861     | 17.2840            | 731.2967                | 19.7901                        |



**Table S9.** Compressibility related to crystallographic axes calculated for the phase **VII** of  $\text{MHy}_2\text{PbI}_4$  calculated in the range between 3.74 GPa and 4.2 GPa with Birch-Murnaghan coefficients.

| Axes                 | K(TPa <sup>-1</sup> ) | $\sigma$ K(TPa <sup>-1</sup> ) | Direction |          |          |
|----------------------|-----------------------|--------------------------------|-----------|----------|----------|
|                      |                       |                                | <i>a</i>  | <i>b</i> | <i>c</i> |
| <b>X<sub>1</sub></b> | 40.9690               | 0.0000                         | 0.2003    | -0.0000  | 0.9797   |
| <b>X<sub>2</sub></b> | -8.1643               | 0.0000                         | 0.0000    | 1.0000   | -0.0000  |
| <b>X<sub>3</sub></b> | -11.5666              | 0.0000                         | -0.9997   | 0.0000   | 0.0255   |
| <b>V</b>             | 21.5603               | 0.0000                         |           |          |          |

Birch-Murnaghan Coefficients

|                       | $B_0$ (GPa) | $\sigma B_0$ (GPa) | $V_0$ (Å <sup>3</sup> ) | $\sigma V_0$ (Å <sup>3</sup> ) |
|-----------------------|-------------|--------------------|-------------------------|--------------------------------|
| <b>2<sup>nd</sup></b> | 31.0261     | 2.9876             | 1415.0668               | 0.0000                         |

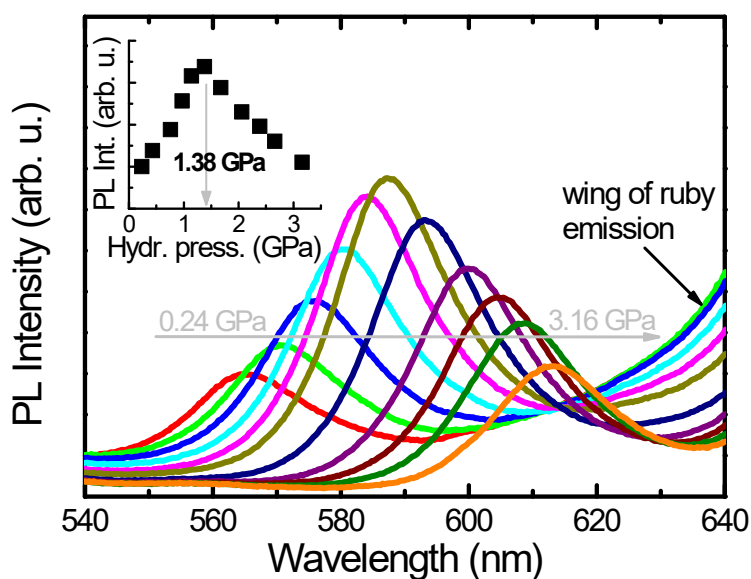

**Figure S5.** The emission spectra of the compressed  $\text{MHy}_2\text{PbI}_4$  crystals with the extracted intensity of PL peak (inset).

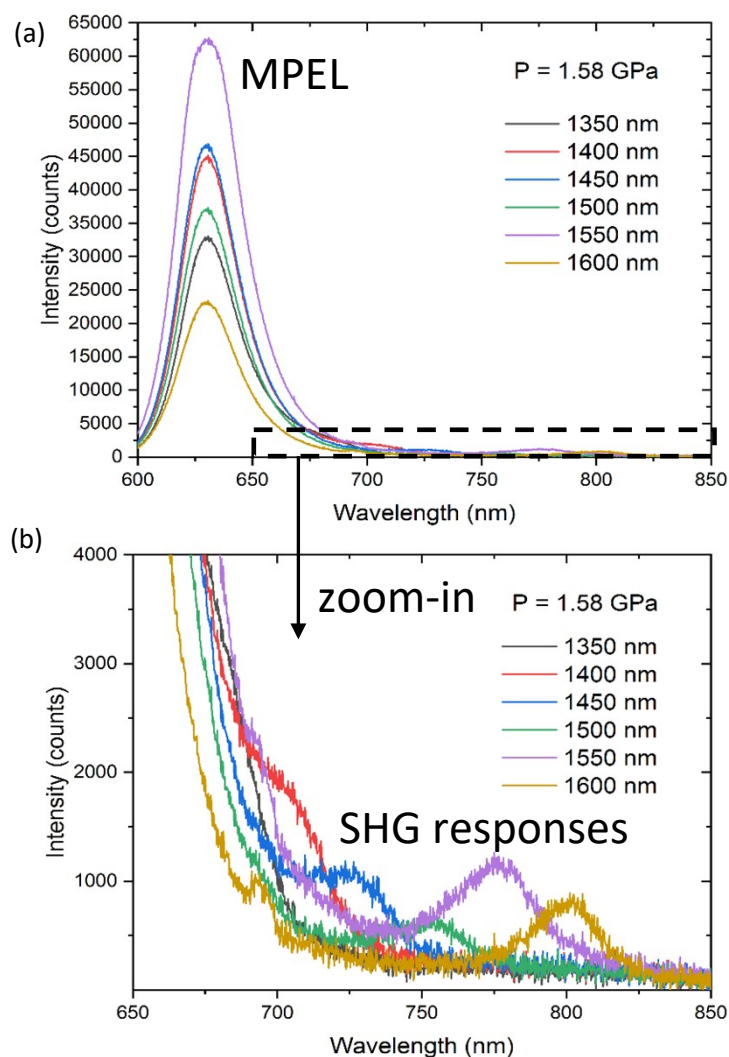

**Figure S6.** Nonlinear optical emissions obtained upon irradiation of  $MHy_2PbI_4$  at 1.58 GPa with femtosecond laser pulses at different wavelengths (1350 – 1600 nm with 50 nm step). MPEL signals do not shift with wavelength change (a) while SHG signals are found at  $\lambda/2$  each, see zoomed-in panel (b).

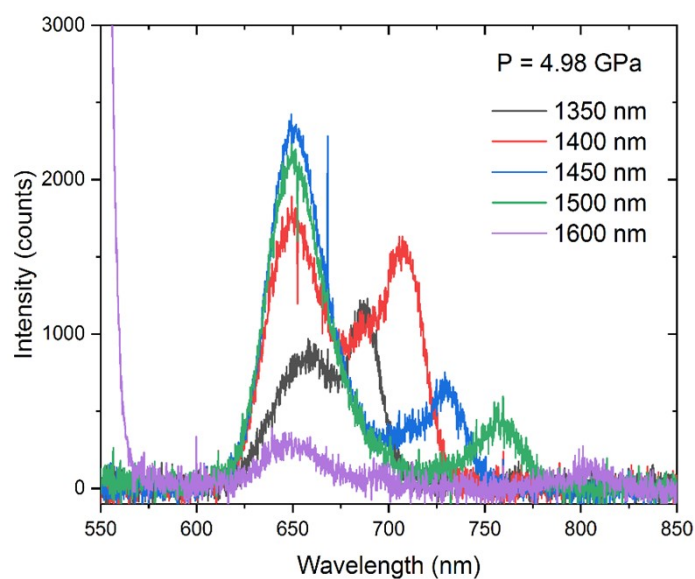

**Figure S7.** Nonlinear optical emissions obtained upon irradiation of  $MHy_2PbI_4$  at 4.98 GPa with femtosecond laser pulses at different wavelengths (1350 – 1600 nm with 50 nm step). MPEL signals do not shift with wavelength change while SHG signals are found at  $\lambda/2$ .

**Table S10.** Wavenumber intercepts at zero pressure ( $\omega_0$ ) and pressure coefficients ( $\omega=d\omega/dP$ ), obtained from fitting of the experimental data by linear functions, for the phases V, VI and VII of  $\text{MHy}_2\text{PbI}_4$ .

| phase V<br>0.07 – 1.15 GPa     |          | phase V<br>1.15 – 3.10         |      | Phase IV<br>3.10-4.2           |       | Assignment                                                |
|--------------------------------|----------|--------------------------------|------|--------------------------------|-------|-----------------------------------------------------------|
| $\omega_0$ (cm <sup>-1</sup> ) | $\alpha$ | $\omega_0$ (cm <sup>-1</sup> ) |      | $\omega_0$ (cm <sup>-1</sup> ) |       |                                                           |
|                                |          |                                |      | 2987.5                         | -6.7  | $\nu_s(\text{CH}_3)$                                      |
| 2954                           | 2.9      | 2963.3                         | 1.3  | 2965.6                         | 2.3   | $\nu_s(\text{CH}_3)$                                      |
| 2673.1                         | 0.5      | 2672.9                         | 0.2  | 2673.7                         | -2.7  | overtone                                                  |
| 2465.6                         | 0.8      | 2467                           | 1.3  | 2467.9                         | 7.0   | overtone                                                  |
| 1606.8                         | -1.1     | 1594.5                         | -1.3 | 1592.7                         | -9.0  | $\delta(\text{NH}_2)$                                     |
| 1570.5                         | -4.0     | 1553.0                         | -3.8 | 1549.0                         | -19.0 | $\delta(\text{NH}_2^+)$                                   |
|                                |          |                                |      | 1536.5                         | -76.7 | $\delta(\text{NH}_2^+)$                                   |
| 1445.25                        | -1.1     | 1442.2                         | -0.8 | 1443.4                         | -2.0  | $\delta_{\text{as}}(\text{CH}_3)$                         |
|                                |          |                                |      | 1431.9                         | -3.3  | $\delta_{\text{as}}(\text{CH}_3)$                         |
| 1408.95                        | -1.5     | 1405.2                         | -3.8 | 1404.4                         | -1.7  | $\delta_s(\text{CH}_3)$                                   |
|                                |          |                                |      | 1211.1                         | 5.0   | $\rho(\text{CH}_3)+\omega(\text{NH}_2)$                   |
| 1200.0                         | -0.3     | 1193.3                         | 6.2  | 1192.5                         | -3.3  | $\rho(\text{CH}_3)+\omega(\text{NH}_2)$                   |
| 1134.0                         | -0.3     | 1137.5                         | -1.5 | 1137.7                         | -5.0  | $\tau(\text{NH}_2^+)+\rho(\text{CH}_3)$                   |
| 1090.3                         | 1.4      | 1097.6                         | 0.2  | 1098.5                         | 4.7   | $\rho(\text{CH}_3)+\tau(\text{NH}_2^+)$                   |
|                                |          |                                |      | 1020.6                         | 3.3   | $\nu_{\text{as}}(\text{CNN})$                             |
| 976.95                         | 0.1      | 989                            | -0.3 | 993.25                         | 14.0  | $\nu_{\text{as}}(\text{CNN})$                             |
| 877.66                         | 5.0      | 891.7                          | 3.0  | 894.7                          | 13.0  | $\nu_s(\text{CNN})$                                       |
|                                |          |                                |      | 862.8                          | 10.0  | $\nu_s(\text{CNN})$                                       |
| 850.24                         | -5.4     | 836.7                          | -1.5 | 836.9                          | -0.7  | $\rho(\text{NH}_2^+)$                                     |
|                                |          |                                |      | 481.9                          | -41.7 | $\delta(\text{CNN})$                                      |
| 434.5                          | 4.3      | 450.6                          | -0.3 | 452.3                          | 7.0   | $\delta(\text{CNN})$                                      |
|                                |          | 352.6                          | 8.3  | 354.5                          | 17.3  | $\tau(\text{NH}_2)$                                       |
|                                |          | 314.9                          | -0.2 | 310.8                          | -7.7  | $\tau(\text{NH}_2)$                                       |
| 209.3                          | 16.9     | 259.1                          | 1.2  | 262.1                          | 17.3  | L(MHy <sup>+</sup> )+ T'(MHy <sup>+</sup> )+ Pb-I stretch |
| 165.6                          | 0.6      | 182.9                          | 6.3  | 188.5                          | 23.7  | L(MHy <sup>+</sup> )+ T'(MHy <sup>+</sup> )+ Pb-I stretch |

\* assignment is adopted from Maczka, M.; Ptak, M. *J. Phys.Chem. C* **2022**, *126*, 7991-7998.  $\nu_s$ ,  $\nu_{\text{as}}$ ,  $\delta$ ,  $\rho$ ,  $\omega$  and  $\tau$  denote symmetric stretching, antisymmetric stretching, scissoring, rocking, wagging and twisting vibrations. L and T' correspond to the librational and translational modes, respectively.

**Table S11.** Detailed crystallographic data for MHy<sub>2</sub>Pbl<sub>4</sub> at high-pressure.

| Pressure                                        |              | 0.22 GPa                                                | 1.00 GPa                                                | 1.30 GPa                                                | 1.70 GPa                                                | 2.10 GPa                                                | 2.64 GPa                                                |
|-------------------------------------------------|--------------|---------------------------------------------------------|---------------------------------------------------------|---------------------------------------------------------|---------------------------------------------------------|---------------------------------------------------------|---------------------------------------------------------|
| CCDC numbers                                    |              | 2298911                                                 | 2298912                                                 | 2298913                                                 | 2298914                                                 | 2298915                                                 | 2298916                                                 |
| Crystal system                                  |              | orthorhombic                                            | orthorhombic                                            | orthorhombic                                            | orthorhombic                                            | orthorhombic                                            | orthorhombic                                            |
| Space group                                     |              | <i>Pmmn</i>                                             | <i>Pmmn</i>                                             | <i>Pmn2<sub>1</sub></i>                                 | <i>Pmn2<sub>1</sub></i>                                 | <i>Pmn2<sub>1</sub></i>                                 | <i>Pmn2<sub>1</sub></i>                                 |
| Unit cell dimensions                            | <i>a</i> (Å) | 18.4404(15)                                             | 17.9087(11)                                             | 17.8170(11)                                             | 17.6111(2)                                              | 17.571(18)                                              | 17.24(3)                                                |
|                                                 | <i>b</i> (Å) | 6.35(9)                                                 | 6.30(5)                                                 | 6.2811(10)                                              | 6.2619(2)                                               | 6.1827(2)                                               | 6.1573(5)                                               |
|                                                 | <i>c</i> (Å) | 6.3926(14)                                              | 6.3600(8)                                               | 6.22(6)                                                 | 6.201(9)                                                | 6.2444(2)                                               | 6.2293(4)                                               |
| Unit cell angles                                | $\alpha$ (°) | 90                                                      | 90                                                      | 90                                                      | 90                                                      | 90                                                      | 90                                                      |
|                                                 | $\beta$ (°)  | 90                                                      | 90                                                      | 90                                                      | 90                                                      | 90                                                      | 90                                                      |
|                                                 | $\gamma$ (°) | 90                                                      | 90                                                      | 90                                                      | 90                                                      | 90                                                      | 90                                                      |
| Volume (Å <sup>3</sup> )                        |              | 748(10)                                                 | 718(6)                                                  | 696(7)                                                  | 683.8(10)                                               | 678.4(7)                                                | 661.3(12)                                               |
| Z/Z'                                            |              | 2/0.5                                                   | 2/0.5                                                   | 2/0.5                                                   | 2/0.5                                                   | 2/0.5                                                   | 2/0.5                                                   |
| Molecular volume (V/Z)                          |              | 374                                                     | 359                                                     | 348                                                     | 341.9                                                   | 339.2                                                   | 330.65                                                  |
| Calculated density (g/cm <sup>3</sup> )         |              | 3.650                                                   | 3.808                                                   | 3.860                                                   | 3.929                                                   | 3.960                                                   | 4.063                                                   |
| Absorption (mm <sup>-1</sup> )                  |              | 19.482                                                  | 20.312                                                  | 20.957                                                  | 21.331                                                  | 21.501                                                  | 22.057                                                  |
| F(000)                                          |              | 696                                                     | 668                                                     | 696                                                     | 696                                                     | 696                                                     | 696                                                     |
| Crystal size (mm)                               |              | 0.175 × 0.131 × 0.03                                    | 0.175 × 0.131 × 0.03                                    | 0.173 × 0.131 × 0.03                                    | 0.175 × 0.131 × 0.03                                    | 0.175 × 0.131 × 0.03                                    | 0.175 × 0.131 × 0.03                                    |
| 2 $\theta$ -range for data collection (°)       |              | 6.746 to 52.49                                          | 6.798 to 52.57                                          | 6.878 to 53.60                                          | 6.506 to 54.828                                         | 6.59 to 55.296                                          | 9.31 to 52.296                                          |
| Min/max indices: <i>h</i> , <i>k</i> , <i>l</i> |              | -5 ≤ <i>h</i> ≤ 5, -6 ≤ <i>k</i> ≤ 7, -7 ≤ <i>l</i> ≤ 7 | -5 ≤ <i>h</i> ≤ 5, -6 ≤ <i>k</i> ≤ 7, -7 ≤ <i>l</i> ≤ 7 | -5 ≤ <i>h</i> ≤ 5, -7 ≤ <i>k</i> ≤ 7, -6 ≤ <i>l</i> ≤ 7 | -5 ≤ <i>h</i> ≤ 5, -8 ≤ <i>k</i> ≤ 8, -8 ≤ <i>l</i> ≤ 7 | -4 ≤ <i>h</i> ≤ 4, -8 ≤ <i>k</i> ≤ 7, -8 ≤ <i>l</i> ≤ 7 | -4 ≤ <i>h</i> ≤ 4, -7 ≤ <i>k</i> ≤ 7, -7 ≤ <i>l</i> ≤ 7 |
| Reflect. Collected/unique                       |              | 1351/236                                                | 2141/252                                                | 1298/363                                                | 3891/511                                                | 3249/434                                                | 2880/354                                                |
| Data/restrains/parameter s                      |              | 236/90/41                                               | 252/45/41                                               | 363/70/57                                               | 511/46/56                                               | 434/45/57                                               | 354/71/56                                               |
| Goodness-of-fit on F <sup>2</sup>               |              | 1.149                                                   | 1.192                                                   | 1.011                                                   | 1.154                                                   | 1.132                                                   | 1.124                                                   |
| Final R1/wR2 ( <i>l</i> >2 $\sigma$ 1)          |              | 0.0844/0.2146                                           | 0.0425/0.0947                                           | 0.0720/0.1613                                           | 0.0276/0.0674                                           | 0.0244/0.0484                                           | 0.0491/0.1084                                           |
| R <sub>1</sub> /wR <sub>2</sub> (all data)      |              | 0.0936/0.2270                                           | 0.0511/0.0964                                           | 0.0873/0.1734                                           | 0.0273/0.0678                                           | 0.0251/0.0490                                           | 0.0528/0.1124                                           |
| Largest diff. peak/hole (e.Å <sup>-3</sup> )    |              | 1.28/-1.07                                              | 0.87/-0.69                                              | 1.36/-1.01                                              | 0.82/-0.77                                              | 0.71/-0.60                                              | 1.22/-1.28                                              |

$$w=1/(\sigma^2 F_o^2+w_1^2 P^2+w_2 P), \text{ where } P=(\text{Max}(F_o^2,0)+2 F_c^2)$$

**Table S12.** Detailed crystallographic data for MHy<sub>2</sub>PbI<sub>4</sub> at high-pressure.

| Pressure                                                        |              | 3.00 GPa                                                | 3.30 GPa                                                  | 3.74 GPa                                                  | 4.20 GPa                                                  |
|-----------------------------------------------------------------|--------------|---------------------------------------------------------|-----------------------------------------------------------|-----------------------------------------------------------|-----------------------------------------------------------|
| CCDC numbers                                                    |              | 2298917                                                 | 2298918                                                   | 2298919                                                   | 2298920                                                   |
| Crystal system                                                  |              | orthorhombic                                            | monoclinic                                                | monoclinic                                                | monoclinic                                                |
| Space group                                                     |              | <i>Pmn</i> 2 <sub>1</sub>                               | <i>P</i> 2 <sub>1</sub>                                   | <i>P</i> 2 <sub>1</sub>                                   | <i>P</i> 2 <sub>1</sub>                                   |
| Unit cell dimensions                                            | <i>a</i> (Å) | 17.19(2)                                                | 6.1212(3)                                                 | 6.0985(2)                                                 | 6.1302(5)                                                 |
|                                                                 | <i>b</i> (Å) | 6.2150(3)                                               | 12.3727(7)                                                | 12.3284(4)                                                | 12.3747(10)                                               |
|                                                                 | <i>c</i> (Å) | 6.1341(3)                                               | 17.150(5)                                                 | 17.049(5)                                                 | 16.73(3)                                                  |
| Unit cell angles                                                | $\alpha$ (°) | 90                                                      | 90                                                        | 90                                                        | 90                                                        |
|                                                                 | $\beta$ (°)  | 90                                                      | 90.095(13)                                                | 90.097(12)                                                | 90.30(3)                                                  |
|                                                                 | $\gamma$ (°) | 90                                                      | 90                                                        | 90                                                        | 90                                                        |
| Volume (Å <sup>3</sup> )                                        |              | 655.3(8)                                                | 1298.9(4)                                                 | 1281.8(4)                                                 | 1269(2)                                                   |
| <i>Z</i> / <i>Z'</i>                                            |              | 2/0.5                                                   | 4/2                                                       | 4/2                                                       | 4/2                                                       |
| Molecular volume (V/ <i>Z</i> )                                 |              | 327.65                                                  | 324.725                                                   | 320.45                                                    | 317.25                                                    |
| Calculated density (g/cm <sup>3</sup> )                         |              | 4.100                                                   | 4.137                                                     | 4.192                                                     | 4.234                                                     |
| Absorption (mm <sup>-1</sup> )                                  |              | 22.259                                                  | 22.459                                                    | 22.759                                                    | 22.988                                                    |
| F(000)                                                          |              | 696                                                     | 1392                                                      | 1392                                                      | 1392                                                      |
| Crystal size (mm)                                               |              | 0.19 x 0.16 x 0.05                                      | 0.17 x 0.13 x 0.03                                        | 0.17 x 0.13 x 0.03                                        | 0.21 x 0.13 x 0.015                                       |
| 2 $\theta$ -range for data collection (°)                       |              | 9.338 to 52.31                                          | 6.586 to 52.628                                           | 6.61 to 53.206                                            | 6.586 to 52.706                                           |
| Min/max indices: <i>h</i> , <i>k</i> , <i>l</i>                 |              | -3 ≤ <i>h</i> ≤ 3, -7 ≤ <i>k</i> ≤ 7, -7 ≤ <i>l</i> ≤ 7 | -7 ≤ <i>h</i> ≤ 7, -15 ≤ <i>k</i> ≤ 15, -4 ≤ <i>l</i> ≤ 4 | -7 ≤ <i>h</i> ≤ 7, -15 ≤ <i>k</i> ≤ 15, -3 ≤ <i>l</i> ≤ 3 | -7 ≤ <i>h</i> ≤ 7, -15 ≤ <i>k</i> ≤ 15, -5 ≤ <i>l</i> ≤ 4 |
| Reflect. Collected/unique Data/restrains/parameter s            |              | 2388/309<br>309/85/56                                   | 5966/974<br>974/9/43                                      | 6025/926<br>926/1/43                                      | 6862/1331<br>1331/1/47                                    |
| Goodness-of-fit on F <sup>2</sup>                               |              | 1.186                                                   | 1.115                                                     | 1.041                                                     | 1.101                                                     |
| Final R <sub>1</sub> /wR <sub>2</sub> ( <i>I</i> >2 $\sigma$ 1) |              | 0.0435/0.0829                                           | 0.1556/0.2915                                             | 0.1645/0.3629                                             | 0.1730/0.3591                                             |
| R <sub>1</sub> /wR <sub>2</sub> (all data)                      |              | 0.0469/0.0862                                           | 0.1887/0.3139                                             | 0.1789/0.3752                                             | 0.1849/0.3691                                             |
| Largest diff. peak/hole (e.Å <sup>-3</sup> )                    |              | 0.91/-0.97                                              | 2.37/-2.72                                                | 2.89/-3.95                                                | 3.92/-4.04                                                |

$$w=1/(\sigma^2 F_o^2+w_1^2 P^2+w_2^2 P), \text{ where } P=(\text{Max}(F_o^2,0)+2^*F_c^2)$$

**Table S13.** Detailed crystallographic data for MHy<sub>2</sub>PbI<sub>4</sub> at high-temperature.

| Temperature                                     |              | 300 K                                                       | 310 K                                                       | 320 K                                                     | 330 K                                                     | 340 K                                                     | 360 K                                                     | 370 K                                                     |
|-------------------------------------------------|--------------|-------------------------------------------------------------|-------------------------------------------------------------|-----------------------------------------------------------|-----------------------------------------------------------|-----------------------------------------------------------|-----------------------------------------------------------|-----------------------------------------------------------|
| CCDC numbers                                    |              | 2298904                                                     | 2298905                                                     | 2298906                                                   | 2298907                                                   | 2298908                                                   | 2298909                                                   | 2298910                                                   |
| Crystal system                                  |              | orthorhombic                                                | orthorhombic                                                | orthorhombic                                              | orthorhombic                                              | orthorhombic                                              | orthorhombic                                              | orthorhombic                                              |
| Space group                                     |              | <i>Pmcn</i>                                                 | <i>Pmcn</i>                                                 | <i>Pmnn</i>                                               | <i>Pmnn</i>                                               | <i>Pmnn</i>                                               | <i>Pmnn</i>                                               | <i>Pmnn</i>                                               |
| Unit cell dimensions                            | <i>a</i> (Å) | 18.684(4)                                                   | 18.7116(5)                                                  | 18.7487(6)                                                | 18.7824(6)                                                | 18.8229(6)                                                | 18.9231(9)                                                | 18.9775(10)                                               |
|                                                 | <i>b</i> (Å) | 6.3720(13)                                                  | 6.3719(2)                                                   | 6.3729(2)                                                 | 6.3740(2)                                                 | 6.3753(2)                                                 | 6.3804(2)                                                 | 6.3842(2)                                                 |
|                                                 | <i>c</i> (Å) | 12.769(3)                                                   | 12.7687(3)                                                  | 6.3843(2)                                                 | 6.3845(2)                                                 | 6.3839(2)                                                 | 6.3828(2)                                                 | 6.3817(3)                                                 |
| Unit cell angles                                | $\alpha$ (°) | 90                                                          | 90                                                          | 90                                                        | 90                                                        | 90                                                        | 90                                                        | 90                                                        |
|                                                 | $\beta$ (°)  | 90                                                          | 90                                                          | 90                                                        | 90                                                        | 90                                                        | 90                                                        | 90                                                        |
|                                                 | $\gamma$ (°) | 90                                                          | 90                                                          | 90                                                        | 90                                                        | 90                                                        | 90                                                        | 90                                                        |
| Volume (Å <sup>3</sup> )                        |              | 1520.2(5)                                                   | 1522.39(7)                                                  | 762.82(4)                                                 | 764.35(4)                                                 | 766.08(4)                                                 | 770.64(5)                                                 | 773.18(6)                                                 |
| Z/Z'                                            |              | 4/0.5                                                       | 4/0.5                                                       | 2/0.25                                                    | 2/0.25                                                    | 2/0.25                                                    | 2/0.25                                                    | 2/0.25                                                    |
| Molecular volume (V/Z)                          |              | 380.05                                                      | 380.59                                                      | 381.41                                                    | 382.175                                                   | 383.04                                                    | 385.32                                                    | 386.59                                                    |
| Calculated density (g/cm <sup>3</sup> )         |              | 3.535                                                       | 3.530                                                       | 3.522                                                     | 3.514                                                     | 3.446                                                     | 3.425                                                     | 3.414                                                     |
| Absorption (mm <sup>-1</sup> )                  |              | 19.190                                                      | 19.162                                                      | 19.121                                                    | 19.086                                                    | 19.038                                                    | 18.925                                                    | 18.863                                                    |
| F(000)                                          |              | 1392                                                        | 1392                                                        | 696                                                       | 682                                                       | 668                                                       | 668                                                       | 668                                                       |
| Crystal size (mm)                               |              | 0.15 x 0.10 x 0.08                                          | 0.15 x 0.10 x 0.08                                          | 0.15 x 0.10 x 0.08                                        | 0.15 x 0.10 x 0.08                                        | 0.15 x 0.10 x 0.08                                        | 0.15 x 0.10 x 0.08                                        | 0.15 x 0.10 x 0.08                                        |
| 2 $\theta$ -range for data collection (°)       |              | 6.382 to 58.168                                             | 6.382 to 58.168                                             | 6.382 to 57.694                                           | 6.382 to 57.948                                           | 6.382 to 57.874                                           | 6.384 to 57.734                                           | 6.384 to 58.27                                            |
| Min/max indices: <i>h</i> , <i>k</i> , <i>l</i> |              | -25 ≤ <i>h</i> ≤ 24, -8 ≤ <i>k</i> ≤ 8, -16 ≤ <i>l</i> ≤ 17 | -24 ≤ <i>h</i> ≤ 25, -8 ≤ <i>k</i> ≤ 8, -16 ≤ <i>l</i> ≤ 17 | -24 ≤ <i>h</i> ≤ 25, -8 ≤ <i>k</i> ≤ 8, -8 ≤ <i>l</i> ≤ 8 | -24 ≤ <i>h</i> ≤ 25, -8 ≤ <i>k</i> ≤ 8, -8 ≤ <i>l</i> ≤ 8 | -24 ≤ <i>h</i> ≤ 25, -8 ≤ <i>k</i> ≤ 8, -8 ≤ <i>l</i> ≤ 8 | -24 ≤ <i>h</i> ≤ 25, -8 ≤ <i>k</i> ≤ 8, -8 ≤ <i>l</i> ≤ 8 | -26 ≤ <i>h</i> ≤ 24, -8 ≤ <i>k</i> ≤ 8, -8 ≤ <i>l</i> ≤ 8 |
| Reflect. Collected/unique                       |              | 13638/1943                                                  | 13671/1945                                                  | 7002/1058                                                 | 7079/1061                                                 | 7032/1057                                                 | 7005/1056                                                 | 6997/1050                                                 |
| Data/restrains/parameters                       |              | 1943/24/57                                                  | 1945/36/57                                                  | 1058/41/47                                                | 1061/44/46                                                | 1057/3/49                                                 | 1056/50/46                                                | 1050/46/49                                                |
| Goodness-of-fit on F <sup>2</sup>               |              | 1.005                                                       | 0.985                                                       | 1.105                                                     | 1.116                                                     | 1.188                                                     | 1.087                                                     | 1.134                                                     |
| Final R1/wR2 ( <i>l</i> >2 $\sigma$ 1)          |              | 0.0396/0.0806                                               | 0.0403/0.0827                                               | 0.0384/0.0845                                             | 0.0444/0.1035                                             | 0.0458/0.1057                                             | 0.0613/0.1523                                             | 0.0741/0.1795                                             |
| R <sub>1</sub> /wR <sub>2</sub> (all data)      |              | 0.0855/0.0976                                               | 0.0874/0.1005                                               | 0.0478/0.0883                                             | 0.0537/0.1080                                             | 0.0567/0.1106                                             | 0.0745/0.1613                                             | 0.0984/0.1946                                             |
| Largest diff. peak/hole (e.Å <sup>-3</sup> )    |              | 1.93/-1.36                                                  | 1.87/-1.17                                                  | 2.07/-1.09                                                | 1.80/-1.07                                                | 1.75/-1.08                                                | 4.17/-1.21                                                | 5.04/-1.68                                                |

$$w=1/(\sigma^2 F_o^2 + w_1^2 * P^2 + w_2 * P), \text{ where } P=(\text{Max}(F_o^2, 0) + 2 * Fc^2)$$
